# Supplementary material for: Marine Plankton during the Polar Night: Environmental Predictors of Spatial Variability
Source: MDPI journal article supplement (doi:10.3390/biology12030368), 2023-02-25
Supplement: s1 [file s1]

# Supplementary material

## Marine plankton during the polar night: environmental predictors of spatial variability

Vladimir G. Dvoretzky \*, Marina P. Venger, Anastasya V. Vashchenko, Veronika V. Vodopianova, Ivan A. Pastukhov and Tatyana M. Maksimovskaya

Biology 2023.

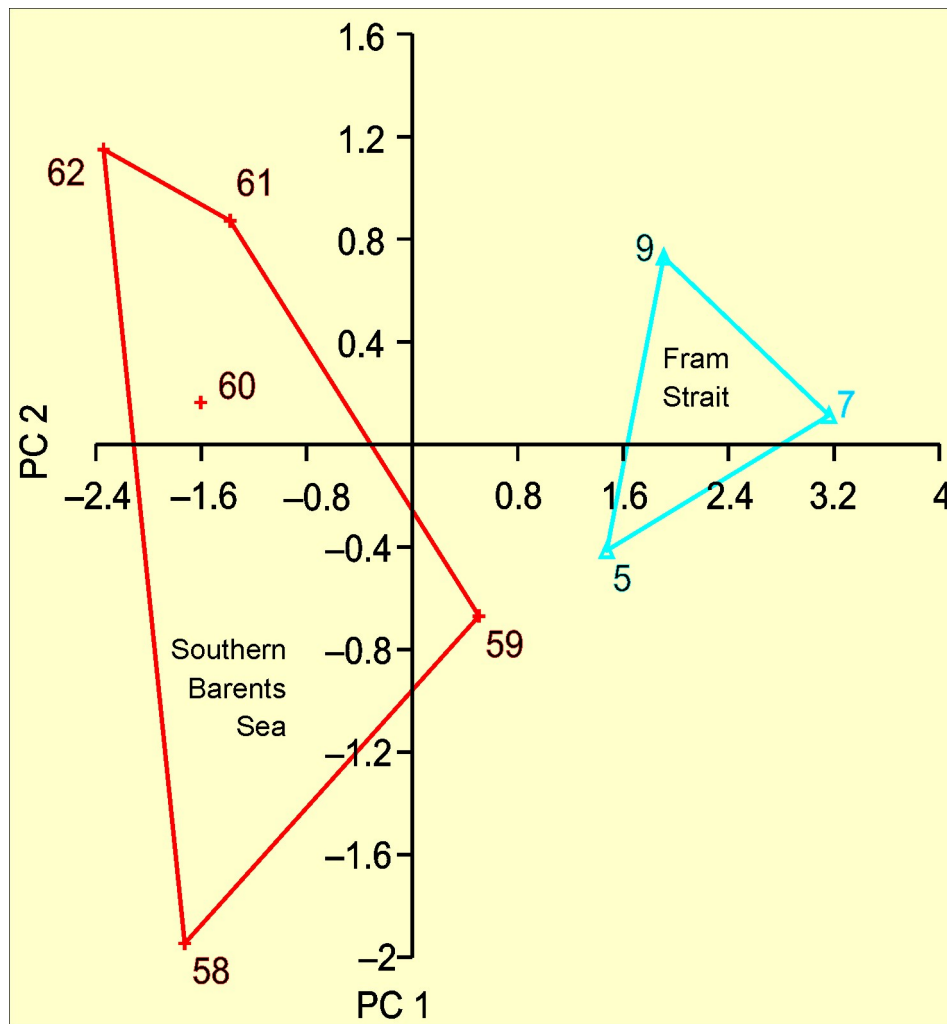

**Figure S1.** Results of principal component analysis (PCA): ordination diagram indicating separations of sampling stations based on hydrological variables (water temperature and salinity) and hydrochemical parameters (dissolved oxygen, nitrate, phosphate, silicate) in the Barents Sea and Fram Strait, winter 2021.

**Table S1.** Factor scores extracted with principal component analysis (PCA) based on hydrological variables (water temperature and salinity) and hydrochemical parameters (dissolved oxygen, nitrate, phosphate, silicate) in the Barents Sea and Fram Strait, winter 2021.

| Region               | Station | PC 1   | PC 2   | PC 3   | PC 4   | PC 5   | PC 6   |
|----------------------|---------|--------|--------|--------|--------|--------|--------|
| Fram Strait          | 5       | 1.477  | -0.413 | 1.396  | -0.466 | 0.135  | -0.016 |
| Fram Strait          | 7       | 3.161  | 0.113  | 0.220  | 0.428  | -0.216 | -0.019 |
| Fram Strait          | 9       | 1.908  | 0.730  | -1.013 | -0.580 | 0.046  | 0.060  |
| Southern Barents Sea | 58      | -1.726 | -1.946 | -0.307 | -0.338 | -0.108 | 0.005  |

|                      |    |        |        |        |        |        |        |
|----------------------|----|--------|--------|--------|--------|--------|--------|
| Southern Barents Sea | 59 | 0.507  | -0.669 | -0.588 | 0.754  | 0.208  | -0.014 |
| Southern Barents Sea | 60 | -1.605 | 0.164  | 0.183  | 0.280  | -0.047 | 0.058  |
| Southern Barents Sea | 61 | -1.381 | 0.872  | -0.526 | -0.264 | -0.013 | -0.100 |
| Southern Barents Sea | 62 | -2.341 | 1.150  | 0.635  | 0.186  | -0.005 | 0.026  |

**Table S2.** Factor loadings extracted with principal component analysis (PCA) based on hydrological variables (water temperature and salinity) and hydrochemical parameters (dissolved oxygen, nitrate, phosphate, silicate) in the Barents Sea and Fram Strait, winter 2021.

| Factor           | PC 1   | PC 2   | PC 3  | PC 4   | PC 5   | PC 6   |
|------------------|--------|--------|-------|--------|--------|--------|
| Temperature      | -0.353 | -0.002 | 0.878 | 0.316  | 0.063  | 0.014  |
| Salinity         | 0.421  | -0.076 | 0.445 | -0.781 | 0.084  | -0.037 |
| Dissolved oxygen | -0.002 | 0.995  | 0.028 | -0.082 | 0.019  | 0.053  |
| Phosphate        | 0.481  | 0.025  | 0.158 | 0.252  | -0.811 | 0.150  |
| Silicate         | 0.482  | 0.063  | 0.059 | 0.353  | 0.271  | -0.750 |
| Nitrate          | 0.484  | -0.019 | 0.037 | 0.308  | 0.508  | 0.641  |

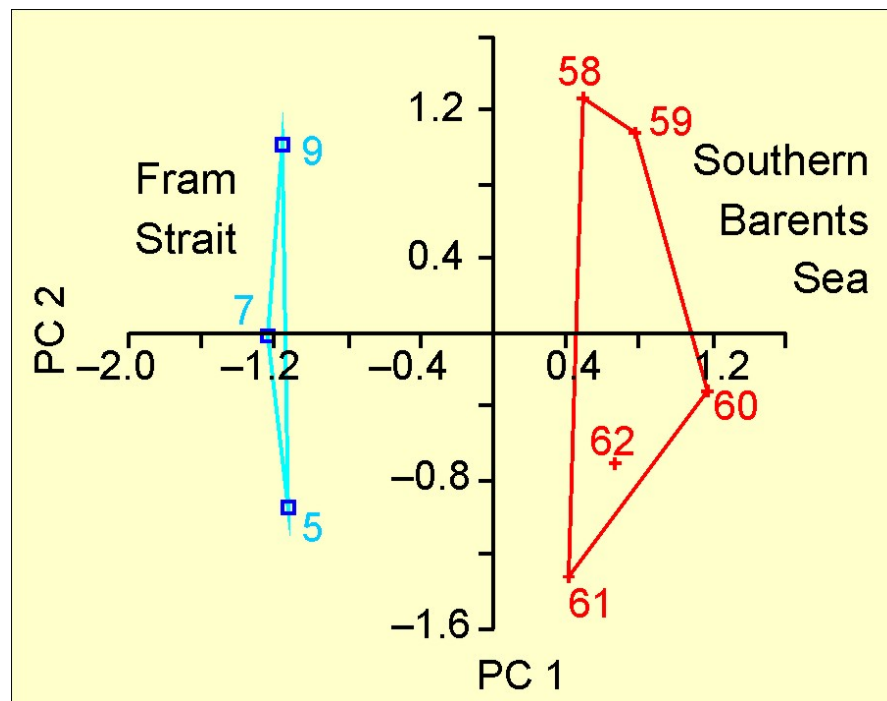

**Figure S2.** Results of principal component analysis (PCA): ordination diagram indicating separations of sampling stations based on biotic variables (bacterial abundance and biomass, viral abundance, chlorophyll *a* concentration, zooplankton abundance and biomass) in the Barents Sea and Fram Strait, winter 2021.

**Table S3.** Plankton abundance and biomass (range and mean $\pm$ SE) in the Fram Strait and in the southern Barents Sea, winter 2021. Comparisons were performed using one-way ANOVA or Kruskal-Wallis test, significant differences at  $p < 0.05$ . n/a - no analysis.

| Layer | Fram Strait | Southern Barents Sea                       |           |                 | p    |
|-------|-------------|--------------------------------------------|-----------|-----------------|------|
|       |             | Bacterial abundance, $10^5$ cells $L^{-1}$ |           |                 |      |
| 0     | 3.23–4.23   | 3.76 $\pm$ 0.50                            | 2.26–4.10 | 3.41 $\pm$ 0.78 | 0.53 |
| 10    | 2.88–4.15   | 3.33 $\pm$ 0.71                            | 2.58–4.30 | 3.35 $\pm$ 0.72 | 0.98 |
| 25    | 2.88–3.24   | 3.07 $\pm$ 0.18                            | 2.51–6.80 | 4.00 $\pm$ 1.71 | 0.40 |
| 50    | 2.54–3.48   | 3.07 $\pm$ 0.49                            | 3.54–4.61 | 4.03 $\pm$ 0.54 | 0.09 |

|                                                             |            |           |            |             |      |
|-------------------------------------------------------------|------------|-----------|------------|-------------|------|
| 100                                                         | 2.62–3.44  | 3.07±0.42 | 2.62–5.25  | 3.49±1.10   | 0.56 |
| 200                                                         | 2.86–2.87  | 2.87±0.01 | –          | –           | n/a  |
| Bottom                                                      | 2.09–2.86  | 2.46±0.39 | 2.30–4.04  | 2.91±0.67   | 0.33 |
| 0–bottom                                                    | 2.09–4.23  | 3.10±0.54 | 2.26–6.80  | 3.50±1.01   | 0.41 |
| Bacterial biomass, mgC m <sup>-3</sup>                      |            |           |            |             |      |
| 0                                                           | 3.60–3.86  | 3.74±0.13 | 3.17–6.26  | 4.96±1.46   | 0.22 |
| 10                                                          | 3.19–4.01  | 3.72±0.46 | 3.36–5.81  | 4.50±0.93   | 0.23 |
| 25                                                          | 2.86–3.31  | 3.11±0.23 | 3.22–7.89  | 5.35±1.67   | 0.07 |
| 50                                                          | 2.78–3.90  | 3.36±0.56 | 3.49–5.63  | 4.90±1.22   | 0.12 |
| 100                                                         | 2.96–3.93  | 3.45±0.49 | 3.54–6.46  | 4.50±1.14   | 0.19 |
| 200                                                         | 2.73–2.79  | 2.76±0.04 | –          | –           | n/a  |
| Bottom                                                      | 2.24–3.33  | 2.61±0.63 | 3.25–5.45  | 4.23±0.98   | 0.04 |
| 0–bottom                                                    | 2.24–4.01  | 3.27±0.55 | 3.17–7.89  | 4.73±1.21   | 0.02 |
| Viral abundance, 10 <sup>6</sup> particles mL <sup>-1</sup> |            |           |            |             |      |
| 0                                                           | 4.03–5.69  | 4.75±0.86 | 0.77–2.23  | 1.52±0.54   | 0.00 |
| 25                                                          | 3.77–4.13  | 4.01±0.2  | 2.29       | 2.29        | n/a  |
| 50                                                          | 3.39–4.8   | 4.08±0.71 | 1.2–1.71   | 1.44±0.26   | 0.00 |
| 100                                                         | 3.32–4.81  | 4.16±0.76 | 1.73–4.85  | 2.85±1.38   | 0.14 |
| Bottom                                                      | 2.04–4.52  | 3.58±1.34 | 0.68–1.77  | 1.14±0.43   | 0.01 |
| 0–bottom                                                    | 2.04–5.69  | 3.09±1.96 | 0.68–4.85  | 1.74±0.95   | 0.00 |
| Chlorophyll <i>a</i> , mg m <sup>-3</sup>                   |            |           |            |             |      |
| 0                                                           | 0.01–0.25  | 0.09±0.14 | 0.01–0.15  | 0.09±0.08   | 0.96 |
| 25                                                          | 0.01–0.08  | 0.03±0.04 | 0.01–0.01  | 0.01±0.00   | 0.22 |
| 50                                                          | 0.09–0.13  | 0.11±0.02 | 0.05–0.09  | 0.08±0.02   | 0.11 |
| 100                                                         | 0.01–0.11  | 0.06±0.05 | 0.01–0.06  | 0.03±0.03   | 0.36 |
| 200                                                         | 0.01–0.01  | 0.01±0.00 | –          | –           | n/a  |
| Bottom                                                      | 0.01–0.01  | 0.01±0.00 | 0.01–0.01  | 0.01±0.00   | n/a  |
| 0–bottom                                                    | 0.01–0.25  | 0.05±0.06 | 0.01–0.15  | 0.04±0.05   | 0.41 |
| Zooplankton abundance, individuals m <sup>-3</sup>          |            |           |            |             |      |
| 0–50                                                        | 714–1248   | 919±288   | 478–753    | 602±125     | 0.07 |
| 50–bottom                                                   | 149–316    | 239±84    | 369–687    | 503±148     | 0.03 |
| 0–bottom                                                    | 149–1248   | 579±418   | 369–753    | 553±139     | 0.06 |
| Zooplankton biomass, mgC m <sup>-3</sup>                    |            |           |            |             |      |
| 0–50                                                        | 3.98–14.12 | 8.08±5.34 | 0.95–4.70  | 3.19±1.95   | 0.10 |
| 50–bottom                                                   | 4.98–10.34 | 7.75±2.68 | 1.80–38.74 | 22.91±14.05 | 0.12 |
| 0–bottom                                                    | 3.98–14.12 | 7.91±3.79 | 0.95–38.74 | 13.05±14.01 | 0.03 |

**Table S4.** Factor scores extracted with principal component analysis (PCA) based on biotic variables (bacterial abundance and biomass, viral abundance, chlorophyll *a* concentration, zooplankton abundance and biomass) in the Barents Sea and Fram Strait, winter 2021.

| Region               | Station | PC 1   | PC 2   | PC 3   | PC 4   | PC 5   | PC 6   | PC 7   |
|----------------------|---------|--------|--------|--------|--------|--------|--------|--------|
| Fram Strait          | 5       | –1.272 | 0.901  | –1.129 | –1.377 | –0.219 | –0.006 | –1.272 |
| Fram Strait          | 7       | –1.013 | –0.467 | –1.027 | 1.712  | 0.640  | 0.379  | –1.013 |
| Fram Strait          | 9       | –1.244 | –0.752 | 1.865  | –0.496 | –0.054 | 0.005  | –1.244 |
| Southern Barents Sea | 58      | 0.666  | –1.346 | –0.647 | –0.082 | –1.666 | –0.815 | 0.666  |
| Southern Barents Sea | 59      | 0.846  | –0.960 | 0.054  | –0.368 | 1.548  | 0.111  | 0.846  |
| Southern Barents Sea | 60      | 1.081  | 0.498  | –0.287 | –0.835 | 0.621  | 0.267  | 1.081  |
| Southern Barents Sea | 61      | 0.320  | 1.349  | 0.619  | 0.866  | 0.113  | –1.718 | 0.320  |
| Southern Barents Sea | 62      | 0.615  | 0.776  | 0.552  | 0.580  | –0.983 | 1.777  | 0.615  |

**Table S5.** Factor loadings extracted with principal component analysis (PCA) based on biotic variables (bacterial abundance and biomass, viral abundance, chlorophyll *a* concentration, zooplankton abundance and biomass) in the Barents Sea and Fram Strait, winter 2021.

| Factor                   | PC 1   | PC 2   | PC 3  | PC 4   | PC 5   | PC 6   |
|--------------------------|--------|--------|-------|--------|--------|--------|
| Bacterial abundance      | 0.112  | 0.656  | 0.231 | 0.247  | 0.084  | -0.381 |
| Bacterial biomass        | 0.344  | 0.427  | 0.337 | 0.191  | -0.005 | 0.241  |
| Viral abundance          | -0.453 | 0.088  | 0.255 | 0.320  | 0.226  | 0.196  |
| Virus-to-bacteria ratio  | -0.465 | -0.094 | 0.186 | 0.225  | 0.354  | 0.366  |
| Average bacterial volume | 0.462  | -0.113 | 0.259 | -0.063 | -0.135 | 0.663  |
| Chlorophyll <i>a</i>     | -0.276 | 0.298  | 0.319 | -0.851 | 0.066  | 0.060  |
| Zooplankton abundance    | -0.087 | -0.408 | 0.714 | 0.094  | -0.432 | -0.339 |
| Zooplankton biomass      | 0.388  | -0.321 | 0.233 | -0.107 | 0.779  | -0.259 |

**Table S6.** Results of 18 GLZ models with microplankton characteristics and chlorophyll *a* concentration as the dependent variables and environmental parameters as independent variables in the Fram Strait and in the southern Barents Sea, winter 2021. Only significant explaining variables ( $p < 0.05$ ) are indicated.

| Dependent variable   | Independent variable | Estimate | SE    | Wald statistic | p     |
|----------------------|----------------------|----------|-------|----------------|-------|
| All data             |                      |          |       |                |       |
| Bacterial abundance  | Temperature          | -0.066   | 0.028 | 5.441          | 0.020 |
| Bacterial biomass    | Salinity             | -0.484   | 0.092 | 27.865         | 0.000 |
| Viral abundance      | Salinity             | 1.366    | 0.549 | 6.190          | 0.013 |
| VBR                  | Salinity             | 1.392    | 0.519 | 7.194          | 0.007 |
| ABV                  | Temperature          | -0.109   | 0.053 | 4.174          | 0.041 |
|                      | Salinity             | -0.874   | 0.196 | 19.887         | 0.000 |
| Chlorophyll <i>a</i> | Temperature          | 0.674    | 0.309 | 4.771          | 0.029 |
|                      | Salinity             | 5.034    | 1.194 | 17.761         | 0.000 |
|                      | Dissolved oxygen     | 0.382    | 0.182 | 4.385          | 0.036 |
|                      | Nitrate              | 0.012    | 0.005 | 7.263          | 0.007 |
|                      | Depth                | -0.019   | 0.005 | 12.656         | 0.000 |
| Fram Strait          |                      |          |       |                |       |
| Bacterial abundance  | Depth                | -0.001   | 0.000 | 5.838          | 0.016 |
| Bacterial biomass    | Depth                | -0.001   | 0.000 | 18.204         | 0.000 |
|                      | Temperature          | -0.118   | 0.053 | 4.989          | 0.026 |
| Viral abundance      | Depth                | -0.028   | 0.010 | 7.706          | 0.006 |
| Chlorophyll <i>a</i> | Temperature          | 2.037    | 0.626 | 10.581         | 0.001 |
|                      | Nitrate              | 0.029    | 0.010 | 8.509          | 0.004 |
| Barents Sea          |                      |          |       |                |       |
| Bacterial biomass    | Salinity             | -1.213   | 0.527 | 5.3            | 0.021 |
| Chlorophyll <i>a</i> | Dissolved oxygen     | 0.512    | 0.258 | 3.9            | 0.047 |

**Table S7.** Ranking of environmental variables influenced zooplankton assemblages in the Fram Strait and in the southern Barents Sea, winter 2021 (Monte Carlo permutation test, 999 permutations). Significant differences was set at  $p < 0.05$ .

| Variable    | Explained variance, % | P     | F    |
|-------------|-----------------------|-------|------|
| Layer       | 26                    | 0.002 | 4.95 |
| Temperature | 17                    | 0.006 | 3.92 |
| Salinity    | 8                     | 0.128 | 1.82 |

|                      |   |       |      |
|----------------------|---|-------|------|
| Nitrate              | 6 | 0.142 | 1.75 |
| Silicate             | 5 | 0.361 | 1.13 |
| Phosphate            | 4 | 0.318 | 1.18 |
| Chlorophyll <i>a</i> | 4 | 0.420 | 1.00 |
| Dissolved oxygen     | 3 | 0.600 | 0.68 |

**Table S8.** Results of 24 GLZ models showing interrelations between biotic variables in the Fram Strait and in the southern Barents Sea, winter 2021. Only significant explaining variables ( $p < 0.05$ ) are indicated.

| Dependent variable    | Independent variable | Estimate | SE    | Wald statistic | p     |
|-----------------------|----------------------|----------|-------|----------------|-------|
| All data              |                      |          |       |                |       |
| Bacterial abundance   | Bacterial biomass    | 1.355    | 0.036 | 1394           | 0.000 |
|                       | ABV                  | -18.9    | 0.805 | 551            | 0.000 |
|                       | Chlorophyll <i>a</i> | 0.120    | 0.042 | 8.2            | 0.004 |
| Bacterial biomass     | ABV                  | 19.2     | 0.543 | 1244           | 0.000 |
| Viral abundance       | VBR                  | 1.967    | 0.112 | 310            | 0.000 |
|                       | Chlorophyll <i>a</i> | 3.147    | 1.267 | 6.170          | 0.013 |
| ABV                   | Bacterial abundance  | -4.083   | 0.043 | 8970           | 0.000 |
|                       | Bacterial biomass    | 3.883    | 0.028 | 19620          | 0.000 |
|                       | Chlorophyll <i>a</i> | -0.111   | 0.034 | 10.7           | 0.001 |
| VBR                   | Viral abundance      | 2.434    | 0.229 | 113            | 0.000 |
|                       | Chlorophyll <i>a</i> | 2.738    | 1.230 | 4.951          | 0.026 |
| Chlorophyll <i>a</i>  | Bacterial abundance  | 188.3    | 40.4  | 21.8           | 0.000 |
|                       | Bacterial biomass    | -126.2   | 23.8  | 28.1           | 0.000 |
|                       | Viral abundance      | -52.4    | 20.5  | 6.5            | 0.011 |
|                       | VBR                  | 51.1     | 17.3  | 8.7            | 0.003 |
|                       | ABV                  | 2108     | 384   | 30.2           | 0.000 |
|                       | Zooplankton biomass  | -4.179   | 1.029 | 16.5           | 0.000 |
| Zooplankton abundance | Chlorophyll <i>a</i> | 4.656    | 2.029 | 5.3            | 0.022 |
| Zooplankton biomass   | Bacterial abundance  | 56.2     | 19.0  | 8.8            | 0.003 |
|                       | ABV                  | 837      | 253.7 | 10.9           | 0.001 |
| Fram Strait           |                      |          |       |                |       |
| Bacterial abundance   | Bacterial biomass    | 1.55     | 0.05  | 902            | 0.000 |
|                       | Viral abundance      | 0.12     | 0.05  | 4.71           | 0.030 |
|                       | VBR                  | -0.07    | 0.03  | 4.81           | 0.028 |
|                       | ABV                  | -24.10   | 0.86  | 790            | 0.000 |
| Bacterial biomass     | Viral abundance      | 1.33     | 0.23  | 32.68          | 0.000 |
|                       | VBR                  | -0.83    | 0.14  | 33.86          | 0.000 |
|                       | ABV                  | 20.04    | 3.61  | 30.86          | 0.000 |
| Viral abundance       | VBR                  | 2.05     | 0.19  | 120            | 0.000 |
|                       | Chlorophyll <i>a</i> | 6.415    | 2.560 | 6.3            | 0.012 |
| VBR                   | Chlorophyll <i>a</i> | 7.255    | 2.389 | 9.2            | 0.002 |
|                       | ABV                  | 3016     | 1337  | 5.09           | 0.024 |
| Chlorophyll <i>a</i>  | Bacterial biomass    | -99      | 39    | 6.33           | 0.012 |
|                       | Zooplankton biomass  | 0.26     | 0.13  | 4.05           | 0.044 |
| Barents Sea           |                      |          |       |                |       |
| Bacterial abundance   | Bacterial biomass    | 1.43     | 0.04  | 1234           | 0.000 |
|                       | ABV                  | -18.20   | 0.67  | 729            | 0.000 |
|                       | Chlorophyll <i>a</i> | 0.11     | 0.05  | 4.32           | 0.038 |
| Bacterial biomass     | ABV                  | 16.69    | 0.54  | 967            | 0.000 |
|                       | Chlorophyll <i>a</i> | 0.12     | 0.05  | 6.77           | 0.009 |
|                       | Bacterial abundance  | 1.38     | 0.04  | 1201           | 0.000 |

|                       |                      |       |       |        |       |
|-----------------------|----------------------|-------|-------|--------|-------|
| Viral abundance       | VBR                  | 2.31  | 0.18  | 166    | 0.000 |
| Chlorophyll <i>a</i>  | Bacterial abundance  | −241  | 87.19 | 7.67   | 0.006 |
|                       | VBR                  | 381   | 171   | 4.96   | 0.026 |
|                       | Bacterial biomass    | 564   | 231   | 5.97   | 0.015 |
|                       | Viral abundance      | −485  | 219   | 4.93   | 0.026 |
| Zooplankton abundance | Chlorophyll <i>a</i> | 16.33 | 3.31  | 24.38  | 0.000 |
|                       | Viral abundance      | 8.34  | 3.79  | 4.84   | 0.028 |
| Zooplankton biomass   | Chlorophyll <i>a</i> | 32.21 | 12.41 | 6.73   | 0.009 |
|                       | Bacterial biomass    | 2628  | 7.22  | 132280 | 0.000 |
|                       | Viral abundance      | 234   | 9.95  | 552    | 0.000 |
